# Supplementary material for: Canalization of Gene Expression and Domain Shifts in the Drosophila Blastoderm by Dynamical Attractors
Source: PLOS journal article supplement (doi:10.1371/journal.pcbi.1000303), 2009-03-12
Supplement: S8 (10.1371/journal.pcbi.1000303.s008) [file journal.pcbi.1000303.s008]

## S8 The calculation of volume changes over time

This section describes a method for calculating the time evolution of an initial volume in the phase space. We used this method to determine the extent of variance reduction in single-nucleus gene circuits (Fig. 4C,D).

Given the diffusionless gap gene dynamical system in the nucleus at A–P position  $x$  (Eq. 2)

$$\frac{dv^a}{dt} = R^a g \left( \sum_{b=1}^N T^{ab} v^b + m^a v^{\text{Bcd}}(x) + \sum_{\beta=1}^{N_e} E^{a\beta} v^\beta(x, t) + h^a \right) - \lambda^a v^a,$$

we want to calculate the volume  $V_t$  at time  $t$  of a box of initial conditions  $\mathcal{B}_0$ . Let us represent the right hand side as  $f(v_t, t)$ , where  $v_t = (v_t^1, v_t^2, v_t^3, v_t^4)$  is the four-dimensional state vector at time  $t$ .

The ODE is discretized into a map,

$$v_{t+dt} = \gamma(v_t, t), \quad (\text{S1})$$

where  $\gamma(v_t, t) = v_t + f(v_t, t)dt$ . Regard the map at time  $t + (n-1)dt$ ,

$$v_{t+ndt} = \gamma(v_{t+(n-1)dt}, t + (n-1)dt),$$

as a curvilinear coordinate transformation of the phase space, then the infinitesimal volume at time  $t + ndt$ ,

$$dV_{t+ndt} = dv_{t+ndt}^1 dv_{t+ndt}^2 dv_{t+ndt}^3 dv_{t+ndt}^4$$

can be written as,

$$dV_{t+ndt} = J(v_{t+(n-1)dt}, t + (n-1)dt) dV_{t+(n-1)dt}. \quad (\text{S2})$$

Here,  $dV_{t+(n-1)dt}$  is the infinitesimal volume at  $t + (n-1)dt$ , and  $J(v_t, t)$  is the Jacobian of the map at time  $t$ . Applying Eq. (S2) repeatedly, the infinitesimal volume at  $t$ ,  $dV_t$ , can be written in terms of the initial infinitesimal volume,  $dV_0$  as

$$dV_t = J(v_{t-(n-1)dt}, t - (n-1)dt) J(v_{t-(n-2)dt}, t - (n-2)dt) \dots J(v_0, 0) dV_0.$$

If the initial box  $\mathcal{B}_0$  evolves to  $\mathcal{B}_t$  at time  $t$ ,  $\mathcal{B}_t$ 's volume is

$$\begin{aligned} V_t &= \iiint_{\mathcal{B}_t} dV_t \\ &= \iiint_{\mathcal{B}_0} [J(v_{t-(n-1)dt}, t - (n-1)dt) \dots J(v_0, 0)] dv_0^1 dv_0^2 dv_0^3 dv_0^4. \end{aligned}$$

The integral on the right hand side was evaluated using the multidimensional trapezoidal rule [1], successively refining the grid on the initial box  $\mathcal{B}_0$  until the integral converged. The time-step for the discretized map  $\gamma(v_t, t)$  was chosen small enough such that the Euler-method solution of Eq. (2) converged.

## References

- [1] Press WH, Teukolsky SA, Vetterling WT, Flannery BP (1992) Numerical Recipes in C. Cambridge, U.K.: Cambridge University Press, second edition.
