# Supplementary material for: Canalization of Gene Expression and Domain Shifts in the Drosophila Blastoderm by Dynamical Attractors
Source: PLOS journal article supplement (doi:10.1371/journal.pcbi.1000303), 2009-03-12
Supplement: S18 (10.1371/journal.pcbi.1000303.s018) [file journal.pcbi.1000303.s018]

| <b>Time Class</b> | <b>min<br/>from start<br/>of cycle 13<br/>(<math>t_i</math>)</b> | <b>min<br/>prior to<br/>gastrulation<br/><math>71.1 - t_i</math></b> |
|-------------------|------------------------------------------------------------------|----------------------------------------------------------------------|
| C13               | 10.550                                                           | 60.550                                                               |
| T1                | 24.225                                                           | 46.875                                                               |
| T2                | 30.475                                                           | 40.625                                                               |
| T3                | 36.725                                                           | 34.275                                                               |
| T4                | 42.975                                                           | 28.125                                                               |
| T5                | 49.225                                                           | 21.875                                                               |
| T6                | 55.475                                                           | 15.625                                                               |
| T7                | 61.725                                                           | 9.375                                                                |
| T8                | 67.975                                                           | 3.125                                                                |

Table S1: Time classes. The first column lists the nine time classes into which the expression data are classified. The second column lists the midpoint of each time class  $t_i, i = 0, \dots, 8$  at which the solution is calculated in the model. The last column lists the midpoints of time classes in minutes from gastrulation, which occurs 71.1 min after the onset of cleavage cycle 13 (based on [1]).

## References

- [1] Foe VE, Alberts BM (1983) Studies of nuclear and cytoplasmic behaviour during the five mitotic cycles that precede gastrulation in *Drosophila* embryogenesis. The Journal of Cell Science 61:31–70.
